# Supplementary material for: Cyclin-dependent kinase 19 upregulation correlates with an unfavorable prognosis in hepatocellular carcinoma
Source: PubMed Central journal article supplement (PMC8518165; doi:10.1186/s12876-021-01962-8), 2021-10-14

### Stage 2-3

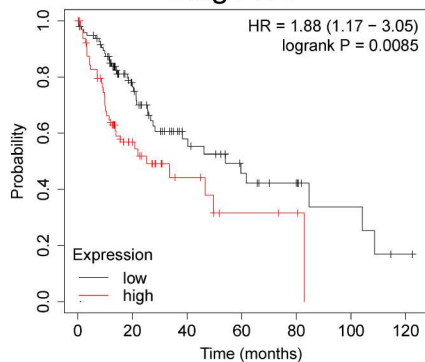

### Stage 3-4

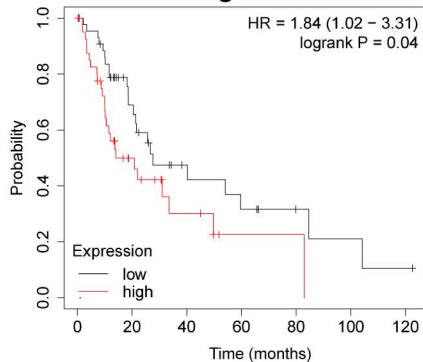

### Grade 2

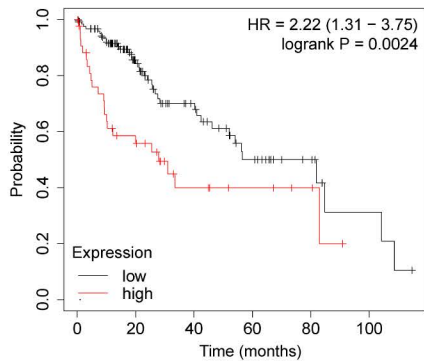

### Male

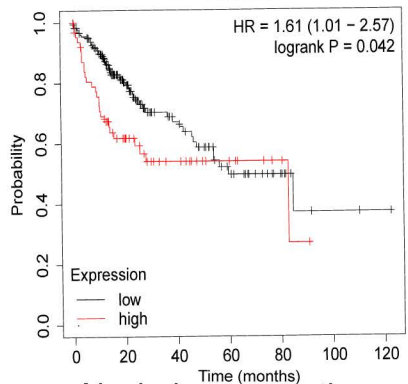

### Asian

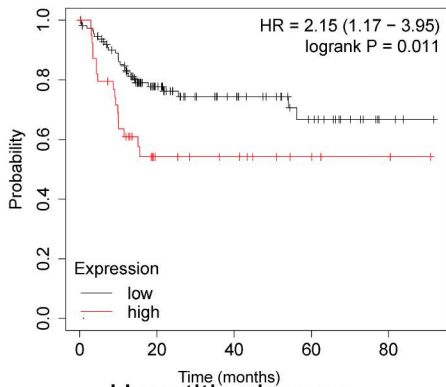

### Alcohol-consumption:yes

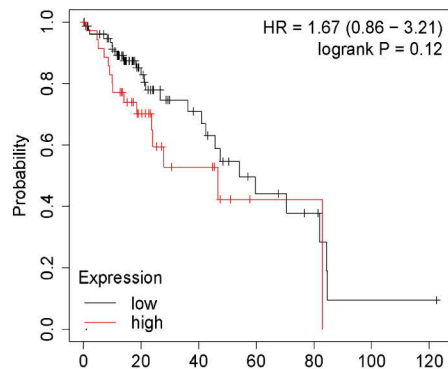

### Hepatitis virus:no

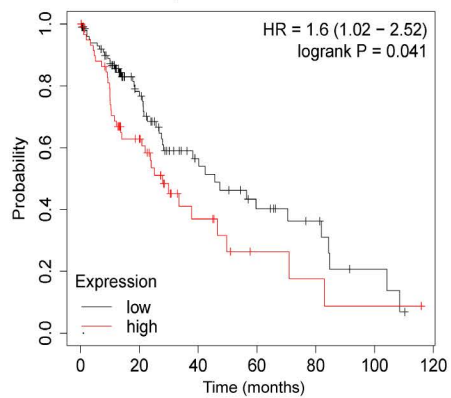

### Sorafenib treatment:treated

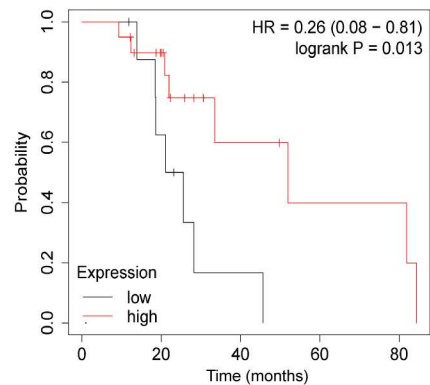

Supplement: 12876_2021_1962_MOESM1_ESM.pdf [file 12876_2021_1962_MOESM1_ESM.pdf]
