# Supplementary material for: Cyclin-dependent kinase 19 upregulation correlates with an unfavorable prognosis in hepatocellular carcinoma
Source: PubMed Central journal article supplement (PMC8518165; doi:10.1186/s12876-021-01962-8), 2021-10-14

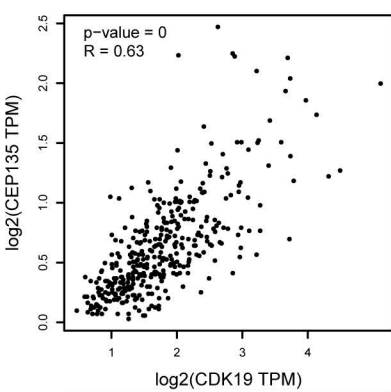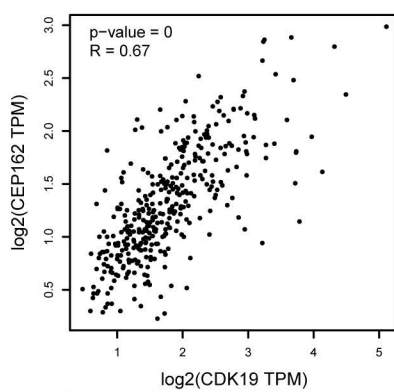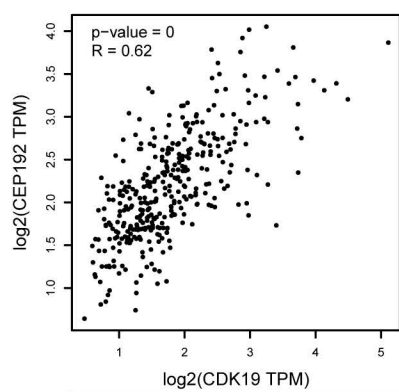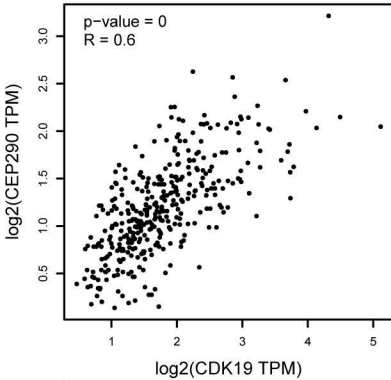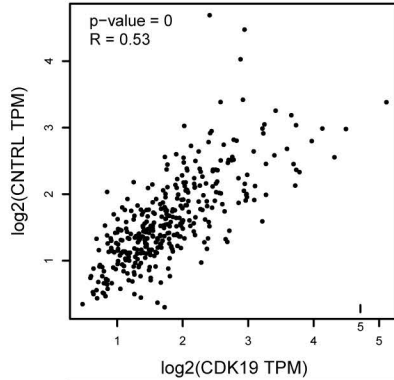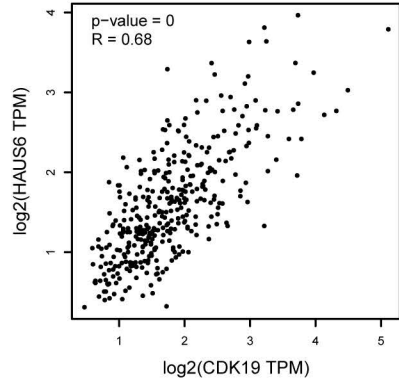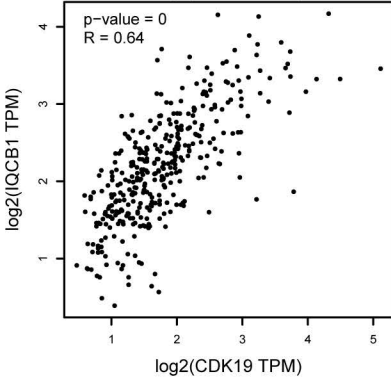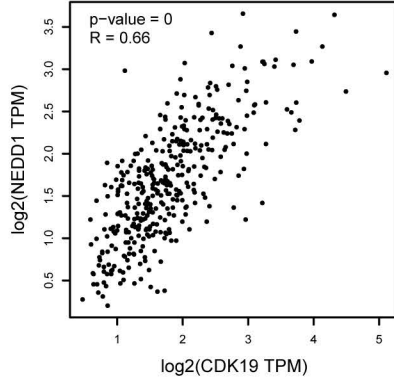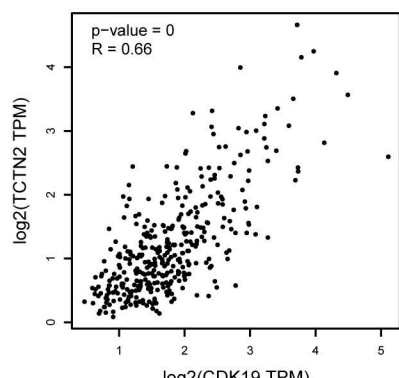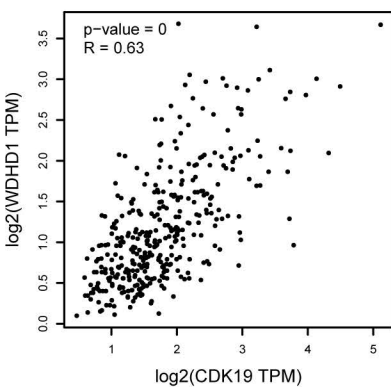

Supplement: 12876_2021_1962_MOESM2_ESM.pdf [file 12876_2021_1962_MOESM2_ESM.pdf]
